# Supplementary material
Source: publisher figshare collection journal article supplement (https://acs.figshare.com/ndownloader/files/3916132)
Supplement: Supplementary file 1 [file 3916132]

# Self-Assembled Three-Dimensional Hierarchical Graphene/Polypyrrole Nanotube Hybrid Aerogel and Its Application for Supercapacitors

Shibing Ye, and Jiachun Feng\*

State Key Laboratory of Molecular Engineering of Polymers, Department of Macromolecular Science and Laboratory of Advanced Materials, Fudan University, Shanghai 200433, China.

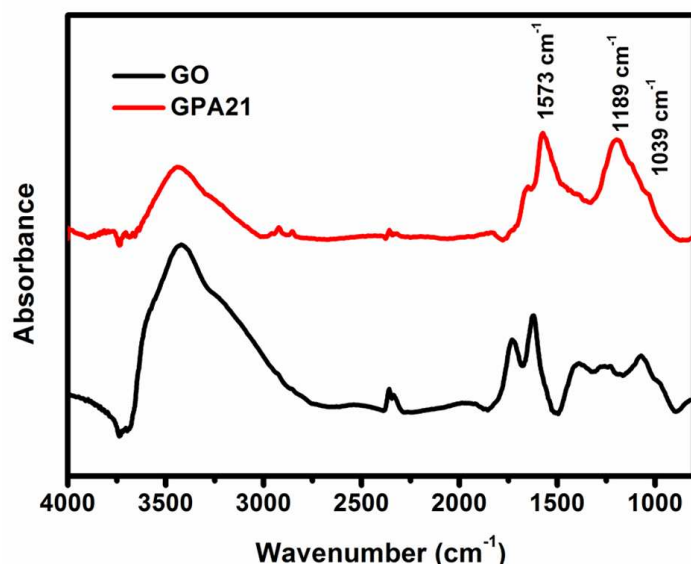

**Figure S1.** FTIR spectra of GO and GPA21.

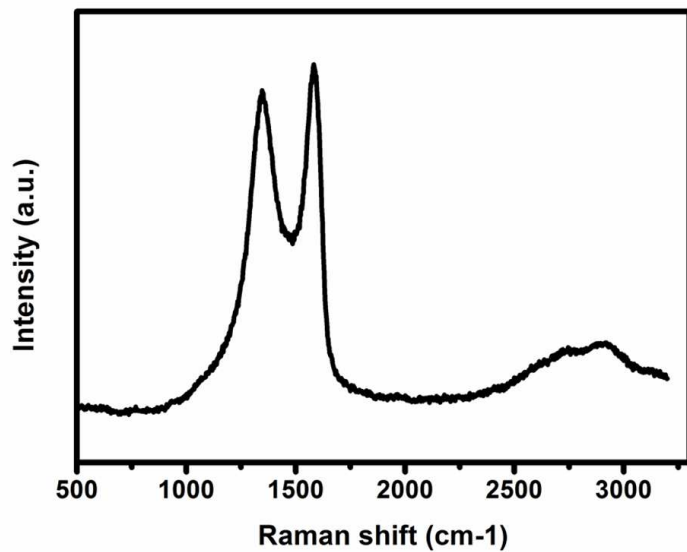

**Figure S2.** Raman spectrum of GO.

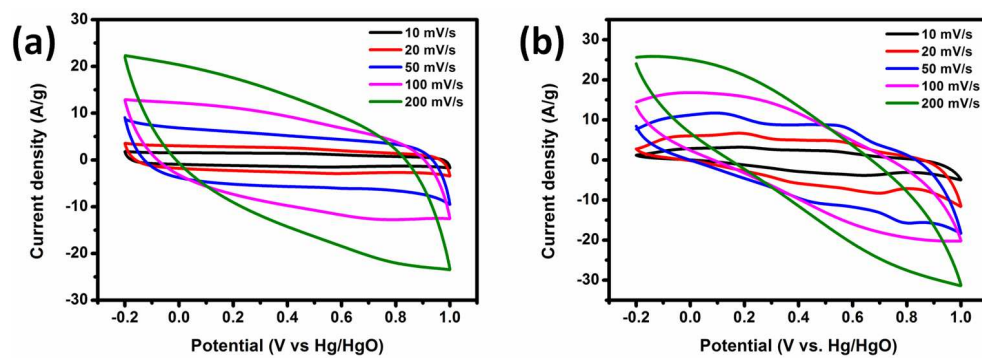

**Figure S3.** CV curves of GA (a) and PNT (b) at different scan rates of 10, 20, 50, 100, and 200 mV/s.
